# Supplementary material for: Intermittent Fasting versus Continuous Calorie Restriction: Which Is Better for Weight Loss?
Source: MDPI journal article supplement (doi:10.3390/nu14091781), 2022-04-24
Supplement: s1 [file s1]

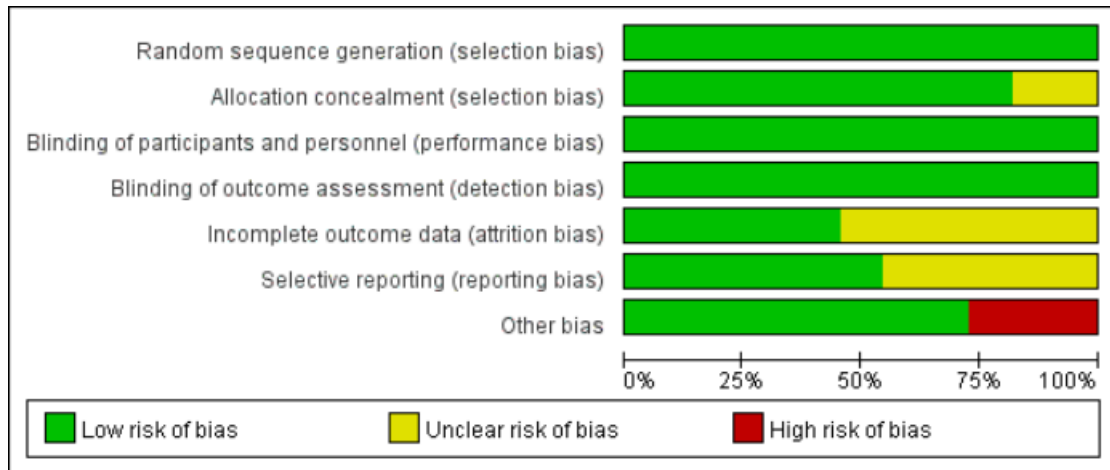

Figure S1. Risk of bias graph: review authors' judgements about each risk of bias item presented as percentages across all included studies.

|                       | Random sequence generation (selection bias) | Allocation concealment (selection bias) | Blinding of participants and personnel (performance bias) | Blinding of outcome assessment (detection bias) | Incomplete outcome data (attrition bias) | Selective reporting (reporting bias) | Other bias |
|-----------------------|---------------------------------------------|-----------------------------------------|-----------------------------------------------------------|-------------------------------------------------|------------------------------------------|--------------------------------------|------------|
| Byrne et al. 2018     | +                                           | ?                                       | +                                                         | +                                               | +                                        | ?                                    | -          |
| Carter et al. 2016    | +                                           | +                                       | +                                                         | +                                               | +                                        | ?                                    | -          |
| Carter et al. 2019    | +                                           | +                                       | +                                                         | +                                               | ?                                        | +                                    | +          |
| Conley et al. 2018    | +                                           | +                                       | +                                                         | +                                               | +                                        | ?                                    | +          |
| Jimenez et al. 2019   | +                                           | +                                       | +                                                         | +                                               | ?                                        | ?                                    | +          |
| Maroofi et al. 2020   | +                                           | ?                                       | +                                                         | +                                               | +                                        | +                                    | -          |
| Parvaresh et al. 2019 | +                                           | +                                       | +                                                         | +                                               | +                                        | +                                    | +          |
| Razavi et al. 2021    | +                                           | +                                       | +                                                         | +                                               | ?                                        | ?                                    | +          |
| Schübel et al. 2018   | +                                           | +                                       | +                                                         | +                                               | ?                                        | +                                    | +          |
| Steger et al. 2021    | +                                           | +                                       | +                                                         | +                                               | ?                                        | +                                    | +          |
| Sundfor et al. 2018   | +                                           | +                                       | +                                                         | +                                               | ?                                        | +                                    | +          |

Figure S2. Risk of bias summary: review authors' judgements about each risk of bias item for each included study.
